# Supplementary material
Source: PubMed Central journal article supplement (PMC4827605)
Supplement: NIHMS773372-supplement-Supplemental_Material.pdf [file NIHMS773372-supplement-Supplemental_Material.pdf]

# The Calcium-Mediated Repression of $\beta$ -Catenin and Its Transcriptional Signaling Mediates Neural Crest Cell Death in an Avian Model of Fetal Alcohol Syndrome

George R. Flentke<sup>1</sup>, Ana Garic<sup>1</sup>, Ed Amberger<sup>1</sup>, Marcos Hernandez<sup>1</sup>, Susan M. Smith<sup>1,2</sup>

From Department of Nutritional Sciences<sup>1</sup> and Waisman Center for Neurodevelopmental Disabilities<sup>2</sup>,  
University of Wisconsin-Madison, 1415 Linden Drive, Madison WI 53706

The first two authors equally contributed to this work.

**Supplemental Figure 1.** Ethanol-induced apoptosis and neural crest numbers are altered by  $\beta$ -catenin and TCF transfection in hindbrain. Shown are dorsal views of the intact HH12+ (17s) hindbrain, transfected as indicated and challenged 3hr thereafter with saline or 52 mM ethanol. **Panels A-F** depict apoptotic cells visualized with LysoTracker Red (LTR, white dots). **Panels A'-F'** show green fluorescent signals overlaid on bright-field images of the same embryos, showing expression of the eGFP internal control in the right lateral hindbrain and migrating neural crest. Lines indicate the neural crest migrating from rhombomeres 2 (r2), r4 and r6. **(A-C)** Saline-treated embryos transfected with **(A)** eGFP, **(B)**  $\beta$ -catenin + eGFP, or **(C)**  $\Delta$ TCF + eGFP. **(D-F)** Embryos challenged with 52 mM ethanol and transfected with **(D)** eGFP, **(E)**  $\beta$ -catenin + eGFP, or **(F)**  $\Delta$ TCF + eGFP. Ethanol treatment significantly enhanced the apoptosis level in eGFP-treated hindbrain (compare abundance of white dots in **A vs. D**). In contrast,  $\beta$ -catenin overexpression strongly reduced the apoptosis levels in both saline and ethanol-treated hindbrain (compare abundance of white dots, **B vs. A, E vs. D**).  $\Delta$ TCF overexpression elevated apoptosis levels in both saline-treated and ethanol-treated hindbrain (compare abundance of white dots, **C vs. A, F vs. D**). In embryos transfected with  $\Delta$ TCF + eGFP, although eGFP expression extended along the hindbrain's rostrocaudal length, the eGFP signal per unit area was consistently lower than for embryos receiving eGFP-only and  $\beta$ -catenin + eGFP. This may reflect the increased apoptosis of the  $\Delta$ TCF-transfected cells. Abbreviations: ov, otic vesicle; r, rhombomere.

# Supplemental Figure 1

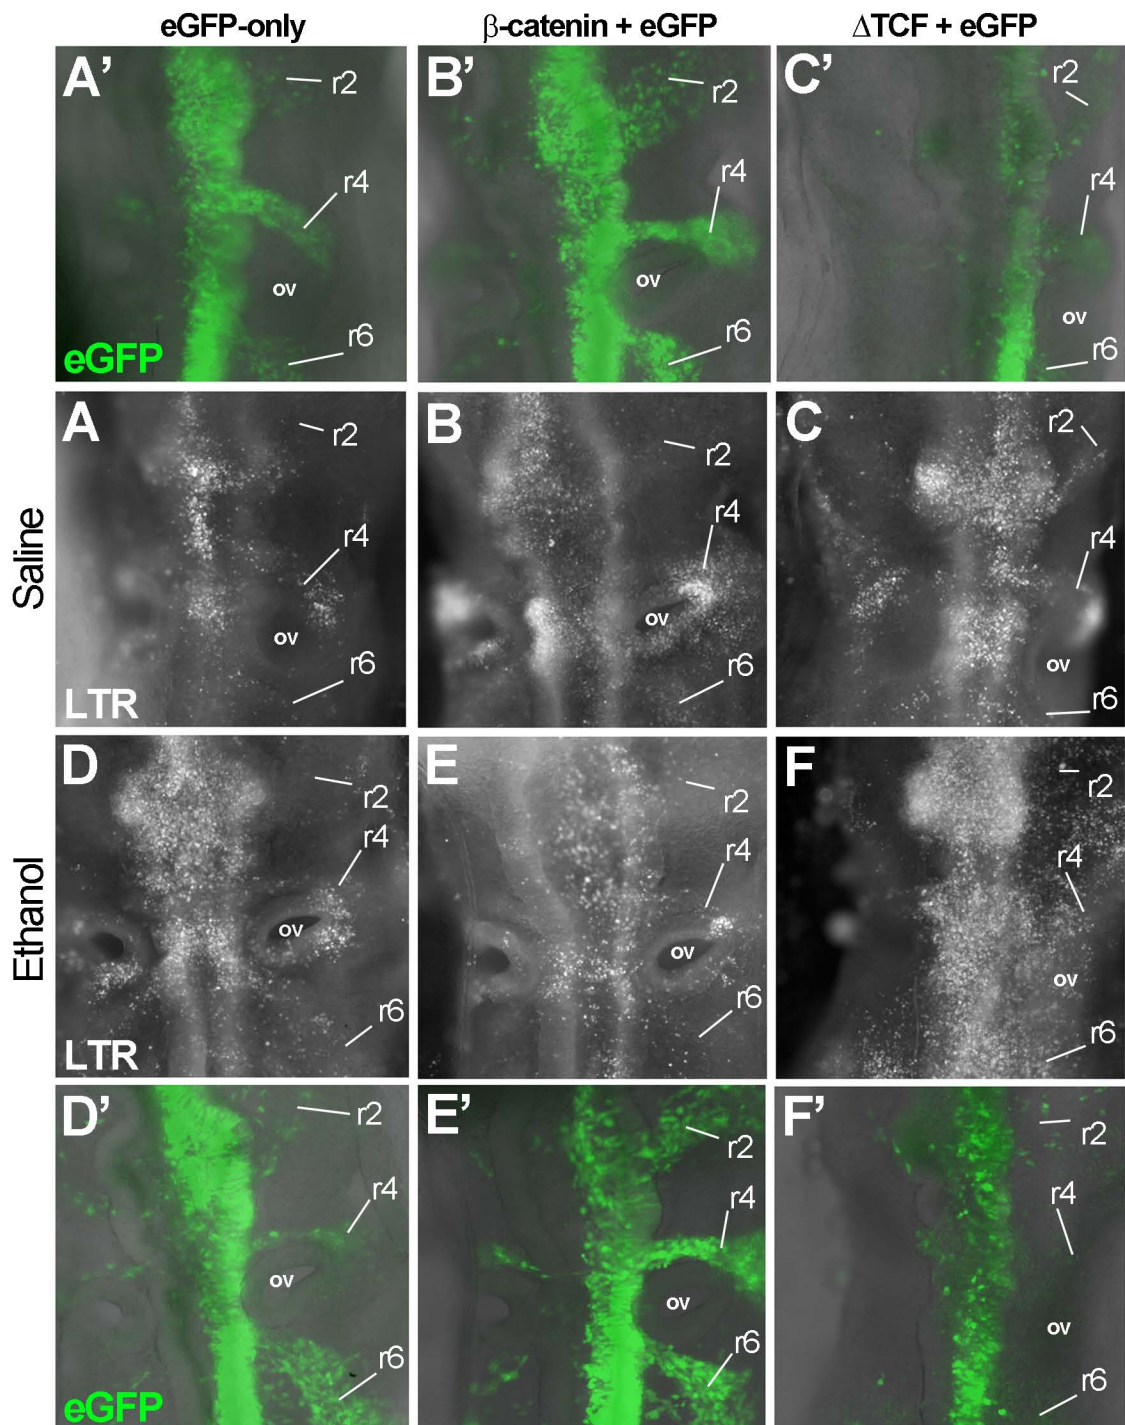

## Supplemental Table 1

### Real-Time PCR Primer Sequences

| <b>Transcript</b> | <b>Accession #</b> | <b>Forward Primer</b>     | <b>Reverse Primer</b>     |
|-------------------|--------------------|---------------------------|---------------------------|
| APC               | XM_001233410.1     | GAGCACCTCAAGGCAAGCATG     | TTCGAGCAGCAGAACCCTGACCA   |
| Bmp4              | NM_205237          | TTCGTCTTCAACCTCAGCAG      | GGCTCACATC(A)AAAGGTCTCC   |
| $\beta$ -catenin  | NM_205081          | AATTGTGCGTACCATGCAAA      | ACACAGAATCCACCGGAGAC      |
| FoxD3             | U37274             | TCTGCGAGTTCATCAGCAAC      | CGAACATGTCCTCAGACTGC      |
| SFRBP             | AF218056.1         | TGGCCCGACATGCTGGACTGCA    | AGGCATCGCAGACTTTGGGTGCTTC |
| Gapdh             | M11213             | CGTGTGTGGACTTGATGGT       | TGGAGGAAGAAATTGGAGGA      |
| GSK3 $\beta$      | XM_416557.2        | TCCTTCGCGGAGAGCTGCAAGC    | GGACCTTGTCCAGGAGTTGCCA    |
| Slug              | X77572             | CATTACTGTGTGGACTAC        | TGTAGTCCACACAGTAATG       |
| Snail             | Y09905             | CCTTTCCCGTGCAGATACAT      | AAAGATGTCCAGATGGGTGC      |
| Tgf $\beta$ 2     | NM_001031045       | GGAATGTGCAGGATAATGC       | ATGGTGAGGGGCTCTAAAT       |
| Wnt1              | AY655699.1         | AAGGGCCGAGATCTGCGCTTCCTG  | ACATGCCGTGGCATTTCACCTCCTG |
| Wnt5a             | AB006014           | ACATCGAGTACGGATAACCGC     | CAGAGACACCGTGGCACTTA      |
| Wnt6              | AF378331           | ACATCAAACCTCCCGACAAG      | CACAGGCAGTTCTCCTCCAG      |
| Wnt9a             | AY753293.1         | ACCAGTTTCGCTTTGAGCGTTGGAA | CGCATGTGTCAGCCCTGCAGAA    |
| Wnt11             | D31901             | TTCATCTTTGGCCCTGAATC      | AGCTCGATGGATGAGCAGTT      |
